# Supplementary material
Source: Oxford University Press journal article supplement (https://aap2.silverchair-cdn.com/aap2/content_public/journal/pediatrics/issue/149/supplement%206/6/toc.pdf)

## CONTENTS

### ARTICLES

- S493 **Rationale and Approach to Evaluating Interventions to Promote Child Health in LMICs** Tyler Vaivada et al
- S500 **Interventions for High-Burden Infectious Diseases in Children and Adolescents: A Meta-analysis** Durray Shahwar A. Khan et al
- S510 **Interventions to Improve Immunization Coverage Among Children and Adolescents: A Meta-analysis** Faareha A. Siddiqui et al
- S528 **Interventions for Neglected Tropical Diseases Among Children and Adolescents: A Meta-analysis** Fatima Abbas Naqvi et al
- S546 **Prevention and Management of High-Burden Noncommunicable Diseases in School-Age Children: A Systematic Review** Reena P Jain et al
- S568 **Mental Health and Positive Development Prevention Interventions: Overview of Systematic Reviews** Leila Harrison et al
- S607 **Digital Interventions for Universal Health Promotion in Children and Adolescents: A Systematic Review** Christina Oh et al
- S637 **Interventions to Promote Physical Activity and Healthy Digital Media Use in Children and Adolescents: A Systematic Review** Christina Oh et al
- S657 **Preventing Unintentional Injuries in School-Aged Children: A Systematic Review** Lama Bou-Karroum et al
- S671 **Interventions Promoting Child Sexual and Reproductive Health and Rights in LMICs: A Systematic Review** Arone Wondwossen Fantaye et al
- S690 **Delivery Strategies Supporting School-Age Child Health: A Systematic Review** Naeha Sharma et al
- S710 **Interventions for Health and Well-Being in School-Aged Children and Adolescents: A Way Forward** Tyler Vaivada et al

doi: 10.1542/peds.2021-053852

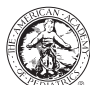

Supplement: Supplementary file 1 [file toc.pdf]
